# Supplementary material for: Post-collection purity correction for internal standard correction-high performance liquid chromatography-quantitative nuclear magnetic resonance
Source: Royal Society of Chemistry journal article supplement (doi:10.1039/d4ay00949e), 2024-01-01
Supplement: d4ay00949e1.pdf [file d4ay00949e1.pdf]

## **Post-collection purity correction for internal standard correction - high performance liquid chromatography - quantitative nuclear magnetic resonance**

Xueyao Li,<sup>a</sup> Wei Zhang,<sup>\*b</sup> Ting Huang,<sup>b</sup> Ming Li,<sup>b</sup> Fuhai Su,<sup>b</sup> Huaxin Wu<sup>a</sup> and Guangshi Tang<sup>\*a</sup>

<sup>a</sup> *College of Chemistry, Beijing University of Chemical Technology, Beijing 100029, China. E-mail: tgs1803@163.com*

<sup>b</sup> *Division of Chemical Metrology and Analytical Science, National Institute of Metrology, Beijing 100029, China. E-mail: zhw@nim.ac.cn*

### **Supporting Information**

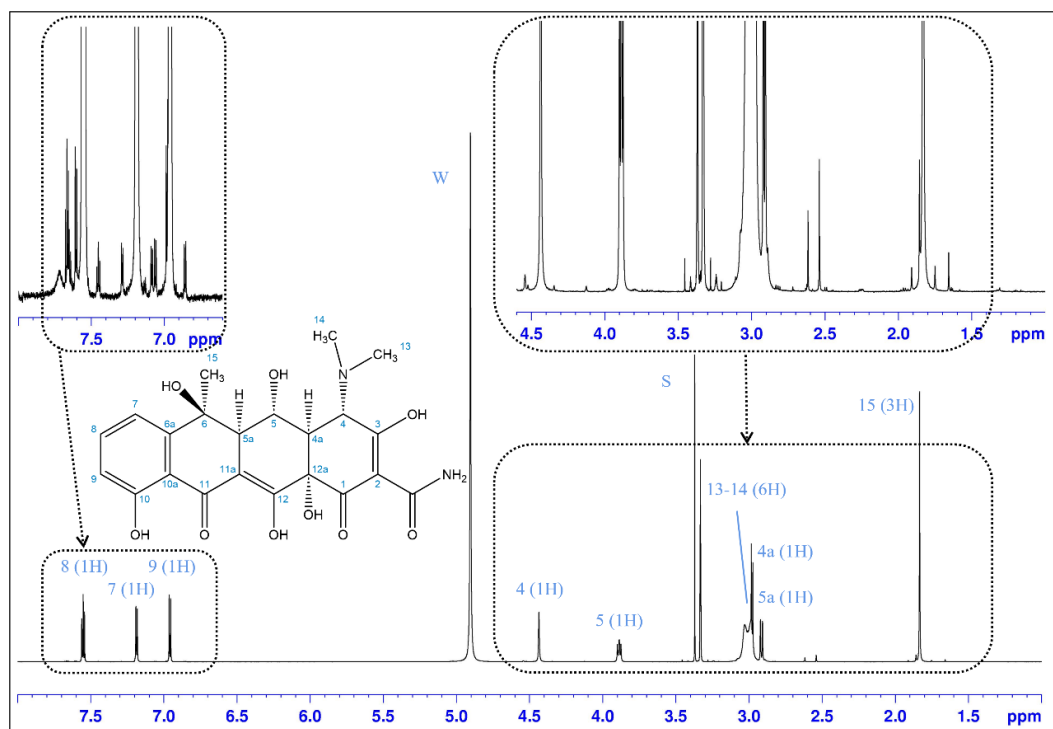

Fig. S1 <sup>1</sup>H NMR spectrum of the OTC in methanol-d<sub>4</sub>. W: water peak; S: solvent residual peak

Table. S1 The longitudinal relaxation time ( $T_1$ ) of the OTC and EP

| chemical shift (ppm) | Analyte and IS | $T_1$ (s) |
|----------------------|----------------|-----------|
| 7.887                | EP(2H)         | 3.720     |
| 7.529                | OTC(1H)        | 1.853     |
| 7.197                | OTC(1H)        | 0.994     |
| 6.960                | OTC(1H)        | 2.855     |
| 3.887                | OTC(1H)        | 1.572     |
| 1.831                | OTC(3H)        | 0.334     |
| 1.384                | EP (3H)        | 2.630     |

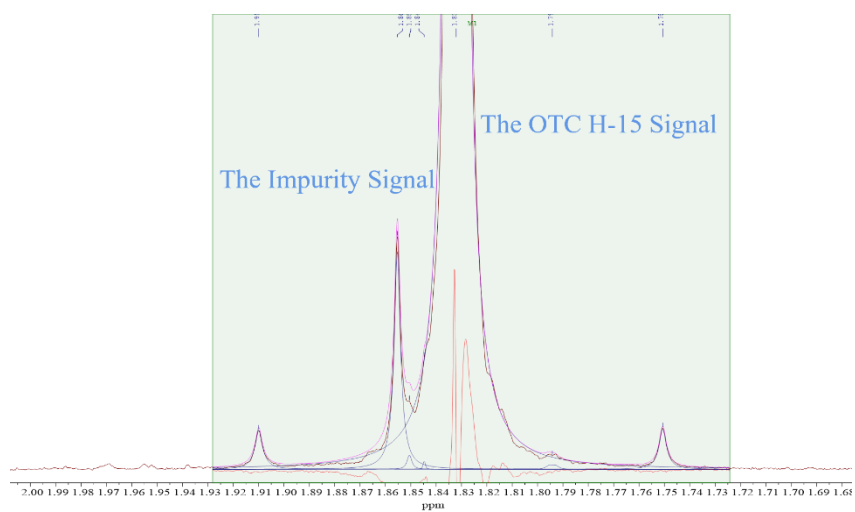

Fig. S2 The deconvolution spectrum of H-15

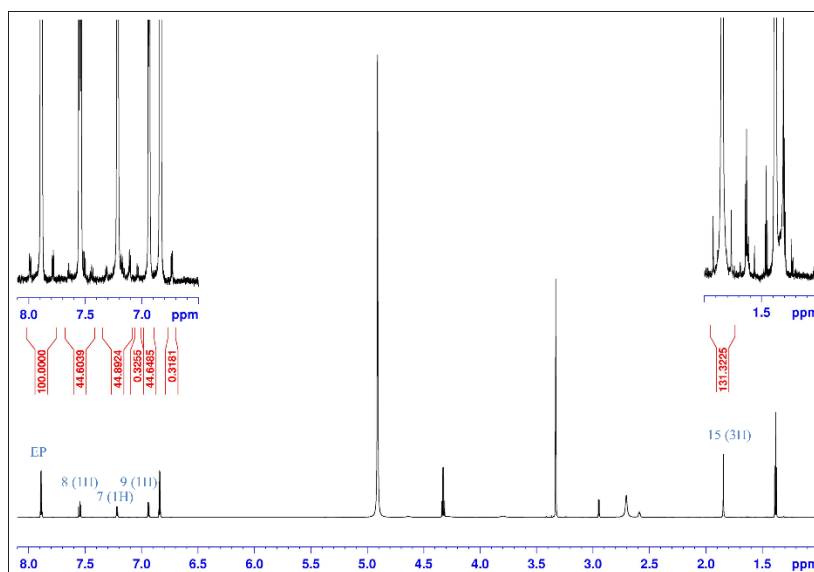

Fig. S3 Schematic of the integration of solution C using the ISC-HPLC-qNMR method (H-9: the corresponding quantitative peak area can be obtained by integrating the area of the EP satellite peak on the other side and subtracting it)

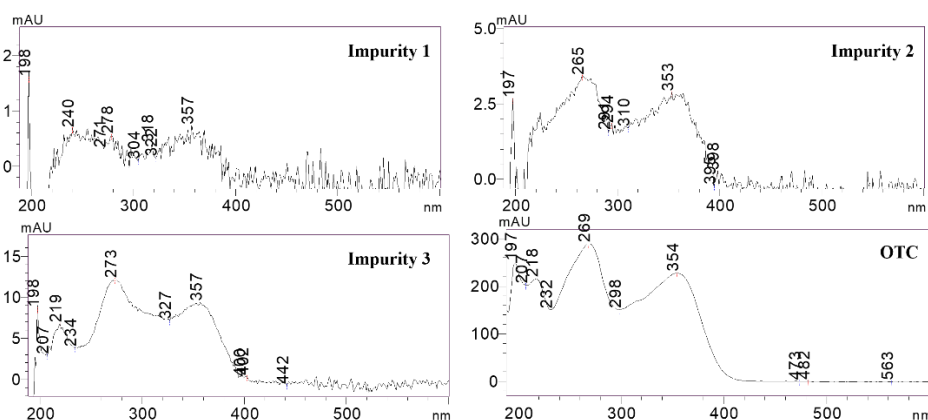

Fig. S4 The UV spectrograms of OTC and the impurities

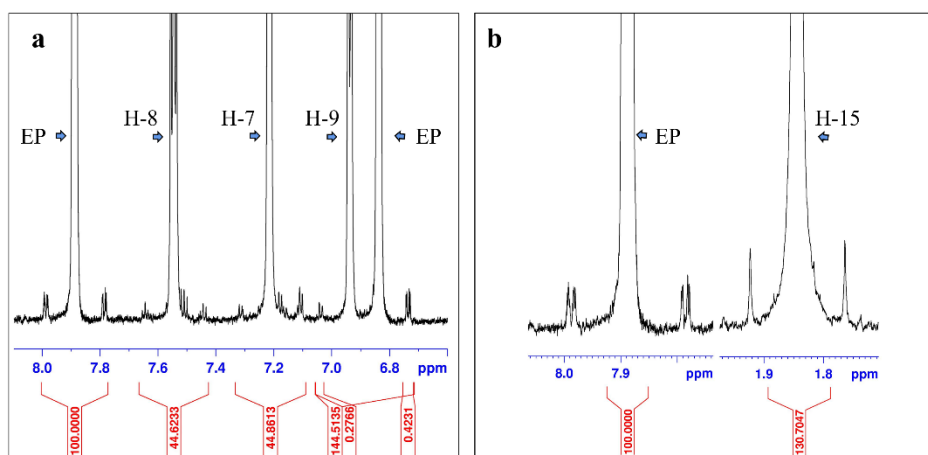

Fig. S5 Schematic of the integration of solution C using the post-collection purity correction for ISC-HPLC-qNMR method. (a: include the satellite peaks in benzene rings region; H-9: same as Fig. S3; b: methyl region; not include the satellite peaks)

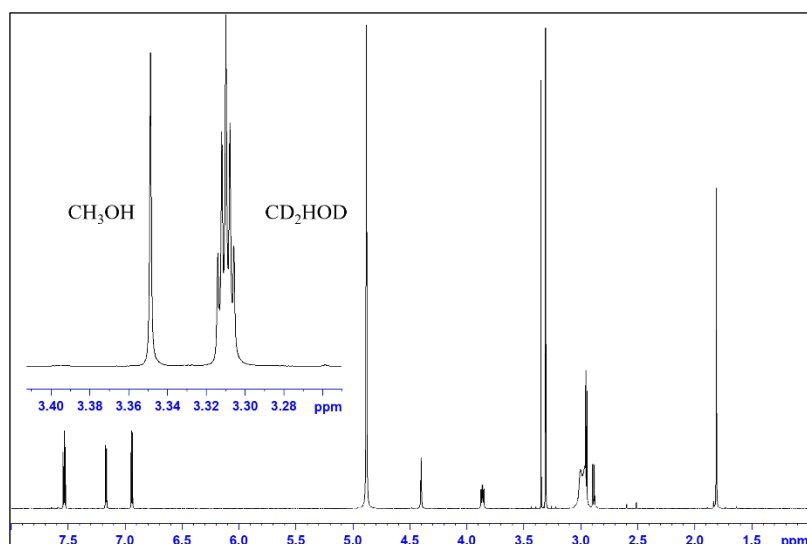

Fig. S6 The NMR spectrum of the OTC (in methanol-d<sub>4</sub> solvent): the signal peak at chemical shift 3.348 for a methyl peak on the residual methanol

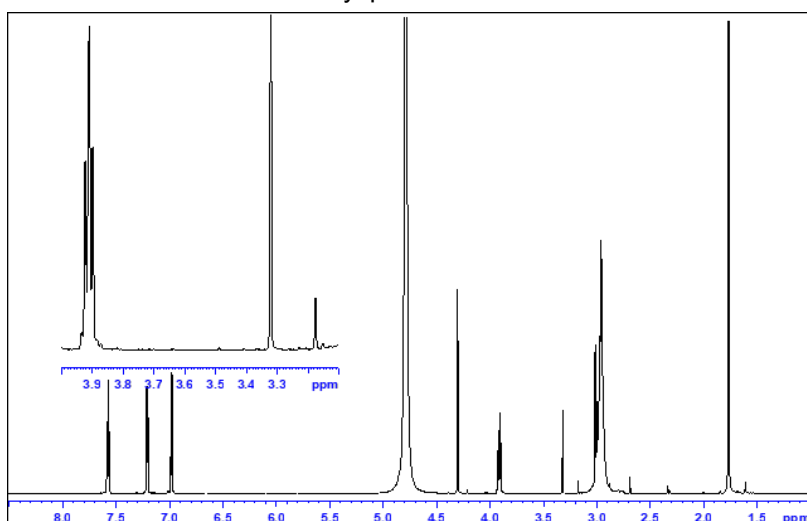

Fig. S7 The NMR spectrum of the OTC (in D<sub>2</sub>O solvent): the signal peak at chemical shift 3.33 for a methyl peak on the residual methanol

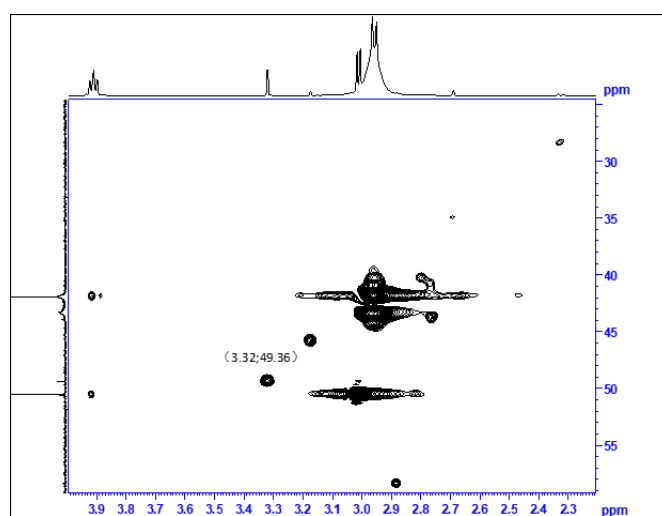

Fig. S8 HSQC spectra of methanol peak

Table S1 Chemical shifts of hydrogen and carbon in the methanol signal in the HSQC spectrum of the OTC sample studied (in D<sub>2</sub>O solvent)

|                                   | Literature Value               | Actual Value                   |
|-----------------------------------|--------------------------------|--------------------------------|
| Chemical Shift ( <sup>1</sup> H)  | 3.36 ppm (CH <sub>3</sub> ; s) | 3.32 ppm (CH <sub>3</sub> ; s) |
| Chemical Shift ( <sup>13</sup> C) | 49.50 ppm (CH <sub>3</sub> )   | 49.36 ppm (CH <sub>3</sub> )   |

Table S2 Quantitative results of residual methanol in OTC

| Result |       |       |       |       |       | Mean  | RSD   |
|--------|-------|-------|-------|-------|-------|-------|-------|
| 0.68%  | 0.62% | 0.58% | 0.65% | 0.57% | 0.63% | 0.62% | 6.70% |
